# Supplementary material
Source: PubMed Central journal article supplement (PMC10024413)
Supplement: 12884_2023_5496_MOESM2_ESM.pdf [file 12884_2023_5496_MOESM2_ESM.pdf]

# Additional file 2. CGM and OGTT questionnaires

## CGM acceptability questionnaire -

Please fill this questionnaire to help us understand how pregnant women find CGM.

**\*Required**

1. Email \*

---

2. Name and Surname \*

---

3. Phone number \*

---

4. Did you find the device generally acceptable (tolerable)? \*

*Mark only one oval.*

1    2    3    4    5

---

I found CGM overall very unacceptable      I found CGM overall very acceptable

---

5. Could you please rate on the following scale the acceptability of the insertion of the device: \*

*Mark only one oval.*

1    2    3    4    5

---

Insertion was very unacceptable      Insertion was very acceptable

---

6. Could you please rate on the following scale the acceptability of wearing the device: \*

*Mark only one oval.*

1    2    3    4    5

---

The device was difficult to wear or caused significant problems      The device was easy to wear and caused no problems

---

7. Could you please rate on the following scale the acceptability of removal of the device: \*

*Mark only one oval.*

1    2    3    4    5

---

Removal of the device was very unacceptable      Removal of the device was very acceptable

---

8. Would you recommend this form of testing for gestational diabetes to other pregnant women? \*

Mark only one oval.

1    2    3    4    5

---

I would not recommend      I would recommend this form of testing to other pregnant women

---

9. Please provide any further comments in the space below:

---

---

---

---

---

---

This content is neither created nor endorsed by Google.

Google Forms

# OGTT acceptability questionnaire -

Please fill this questionnaire to help us understand how pregnant women find OGTT.

\*Required

1. Email \*

---

2. Name and Surname \*

---

3. Phone number \*

---

4. Did you find the OGTT generally acceptable (tolerable)? \*

Mark only one oval.

1 2 3 4 5

---

I found the OGTT overall very unacceptable      I found the OGTT overall very acceptable

---

5. Could you please rate on the following scale the acceptability of having to fast to undergo the test: \*

Mark only one oval.

1 2 3 4 5

---

Fasting was very unacceptable      Fasting was very acceptable

---

6. Could you please rate on the following scale the acceptability of the glucose beverage: \*

Mark only one oval.

1 2 3 4 5

---

The glucose beverage was very unacceptable      The glucose beverage was very acceptable

---

7. Could you please rate on the following scale the acceptability of blood collection: \*

Mark only one oval.

1 2 3 4 5

---

Blood collection was annoying or caused significant problems      Blood collection was not annoying and caused no p

---

8. Could you please rate on the following scale the acceptability of the time frame of the test, including the 2 hours waiting period: \*

Mark only one oval.

1    2    3    4    5

---

The time frame was very unacceptable      The time frame was very acceptable

9. Would you recommend this form of testing for gestational diabetes to other pregnant women? \*

Mark only one oval.

1    2    3    4    5

---

I would not recommend it      I would recommend this form of testing to other pregnant women

10. Please provide any further comments in the space below:

---

---

---

---

---

---

This content is neither created nor endorsed by Google.

Google Forms
